# Supplementary material
Source: Research Square preprint supplement (doi:10.21203/rs.3.rs-10243724/v1)
Supplement: Supplementary file 1 [file b6af7c5c235adbb66ef64951.docx]

**Supplementary material**

*Interactive Figures*: **Figure 1S.** Computational workflow for HDAC8 inhibitor discovery. Schematic representation of the computational approach used in this study.

**Figure 2S.** Structure-activity relationship analysis of spiro compounds. (A) Binding scores of all spiro compounds to HDAC8 Pocket 1. (B) Correlation between binding affinity and physicochemical properties. (C) Core scaffold with highlighted modification regions.

**Figure 3S.** Amino acid composition analysis of the HDAC8 binding pocket. (A) Top 5 most frequent residues by compound. (B) ASP residue frequency analysis across binding affinities. (C) Aromatic vs non-aromatic residue distribution.

**Figure 4S.** ADMET profile comparison of lead compounds. (A) Radar chart comparing key ADMET parameters of KB-282, KB-281, and reference HDAC8 inhibitors. (B) Absorption and distribution parameters visualization highlighting stronger oral bioavailability of spiro compounds compared to hydroxamate inhibitors. (C) Comparative toxicity profiles showing reduced potential for hERG inhibition and hepatotoxicity with KB-282.

**Table S1**: CB-Dock2 docking results across five binding pockets for all 15 compounds; docking score matrix across all 15 compounds and five pockets.

**Table S2**: Compact binding score matrix summarizing Pocket 1–5 affinities for all 15 compounds.

**Table S3**: Amino acid composition analysis of the HDAC8 catalytic pocket (Pocket 1) across all compounds.

**Table S4**: Detailed molecular interactions of KB-282 vs octanediamide in the HDAC8 catalytic site (template and blind docking modes).

**Table S5**: Complete amino acid residue listings (Chain A and Chain B) for all five binding pockets across all 15 compounds.

**Table S6**: Summary of top-5 most frequent residue types per pocket per compound.

**Table S7**: Predicted absorption and distribution parameters (Caco-2 permeability, HIA, MDCK permeability, oral bioavailability at F20%/F30%/F50%, BBB permeability, PPB, VDss).

**Table S8**: Transporter interaction probabilities (OATP1B1, OATP1B3, OATP2B1, OCT1, OCT2, BCRP, BSEP, MATE1, P-glycoprotein — inhibition and substrate classification).

**Table S9**: Predicted metabolism and excretion parameters (CYP1A2, CYP2B6, CYP2C9, CYP2C19, CYP2D6, CYP3A4 inhibition and substrate probabilities, HLM and RLM stability, UGT substrate probability, CLp, CLr, T½, MRT).

**Table S10**: Predicted toxicity parameters (hERG inhibition at 1, 10, and 30 μM; DILI; respiratory, nephro-, eye, and skin toxicity; Ames mutagenicity; rodent carcinogenicity; micronucleus genotoxicity; reproductive, mitochondrial, hemolytic, and repeated-dose toxicity; acute oral toxicity).

**Table S11**: Endocrine disruption potential across the Tox21 nuclear receptor and stress-response panel (AR, ER, AR-LBD, ER-LBD, aromatase, AhR, ARE, ATAD5, HSE, p53, PPARγ, MMP, TR, GR).

**Table S12**: Ecotoxicity endpoints (aquatic toxicity to algae, crustaceans, *D. magna*, fish species, and *T. pyriformis*; avian toxicity; bee toxicity; BCF; biodegradability; photoinduced toxicity).

**Table S13**: Full physicochemical descriptors (MW, atom count, heteroatom count, ring count, rotatable bonds, HBA, HBD, TPSA, SlogP, logS, logP, pKa) for all compounds (admetSAR 3.0; SlogP from RDKit, logP from CLMGraph).

**Tables S14–S16**: Correlation analysis between physicochemical properties and binding affinity (Pearson coefficients, *t*-distribution, df = 7); quantitative SAR analysis by substitution group (means, standard deviations, ranges, improvement relative to unsubstituted baseline); physicochemical property distributions (mean ± SD, median, quartiles, IQR) for the nine novel compounds.

**Tables S17, S18**: Amino acid residue frequency of occurrence across all 15 compounds in Pocket 1; comparison of top- and bottom-performing compounds by residue contact counts.

**Tables S19–S21**: Drug-likeness assessment (Lipinski Rule of Five, Veber criteria, composite drug-like scores); statistical test outcomes (Kruskal–Wallis, Welch *t*-test, Pearson correlations, regression model summary); outlier identification using standardized residuals and Cook's distance.

**Tables S22–S24**: Comparative ADMET profile of lead spiro compounds (KB-281, KB-282) vs reference HDAC8 inhibitors (absorption, distribution, hERG, DILI parameters); pairwise toxicity profile comparison; drug–drug interaction assessment based on cumulative CYP inhibition probability scores.

**Tables S25–S27**: IR, ¹H NMR, and LC-MS spectra of KB-268, KB-270, and KB-292.
