# Supplementary material
Source: Research Square preprint supplement (doi:10.21203/rs.3.rs-10243724/v1)
Supplement: Supplementary file 2 [file d24eebdcef04689144141158.xlsx]

## Sheet: Legend
Supplementary Material — Table index, colour coding, and correction notes
COLOUR CODING
Gold background			Best/top-ranked values
Green background			Favourable ADMET values (low risk / high absorption)
Red background			Unfavourable or high-risk values
Light grey background			Reference compounds (NCC149, PCI-34051, Entinostat, Octanediamide, p53-derived)
Light blue rows			Novel spiro compounds
Gold bold text			KB-282 — highest-affinity compound (Pocket 1 score −12.3 kcal/mol)
TABLE INDEX
S1 Docking Results			CB-Dock2 docking scores and box sizes, 15 compounds × 5 pockets
S2 Scores Matrix			Compact 15 × 5 score matrix
S3 AA Composition P1			Residue frequency in Pocket 1 per compound
S4 Interactions			Bond-level profile: KB-282 vs octanediamide (template and blind docking)
S5 Residues — all pockets			Chain A/B residue listings for all 5 pockets × 15 compounds
S6 AA Freq — all pockets			Top-5 AA frequency per pocket per compound (all 5 pockets)
S7 Absorption & Distrib			Caco-2, HIA, MDCK, F%, BBB, PPB, VDss (admetSAR 3.0)
S8 Transporters			OATP1B1/1B3/2B1, OCT1/2, BCRP, BSEP, MATE1, Pgp (admetSAR 3.0)
S9 Metabolism & Excretion			CYP inhibitors+substrates, HLM, RLM, UGT, CLp, CLr, T½, MRT (admetSAR 3.0)
S10 Toxicity			hERG, DILI, respiratory, nephro, skin/eye, Ames, carcinogenicity, micronucleus, reproductive, mitochondrial, haemolytic, repeated-dose, acute oral
S11 EDC Panel			AR, ER, AR-LBD, ER-LBD, Aromatase, AhR, ARE, ATAD5, HSE, p53, PPARγ, MMP, TR, GR
S12 Ecotoxicity			Bee, avian, algae, crustaceans, fish, T. pyriformis, BCF, biodegradability, phototoxicity
S13 Physicochemical			MW, nAtom, nHet, nRing, nRot, HBA, HBD, TPSA, SlogP, logS, logP, pKa (admetSAR 3.0)
S14 Correlation Analysis			Pearson r recalculated with admetSAR 3.0 descriptors (n=9, df=7)
S15-18 SAR quantitative analysis, physicochemical distributions, and amino acid residue frequency
S15 SAR quantitative analysis			Substitution groups: means, SD, ranges, improvement vs baseline (n=9)
S16 Physicochemical distribution			Mean, SD, median, Q1, Q3, IQR for 9 novel compounds (admetSAR 3.0)
S17 AA frequency (Pocket 1)			Residue type frequency across all 15 compounds in Pocket 1
S18 Top/bottom performers			Residue counts: KB-282 vs KB-281 vs KB-272/KB-283
S19-21 Drug-likeness assessment and statistical analysis outputs
S19 Drug-likeness			Lipinski + Veber criteria — 10 novel compounds including KB-292
S20 Statistical tests			Kruskal-Wallis, Welch t-test, Pearson r, multiple regression (R²=0.797)
S21 Outlier analysis			Std. residuals, Cook’s D, leverage; regression: SlogP+TPSA+HBA
S22-24 Comparative ADMET profile, pairwise toxicity comparison, and drug–drug interaction assessment
S22 ADMET profile comparison			Caco-2, HIA, BBB, PPB, VDss, hERG, DILI for leads vs references
S23 Toxicity profile comparison			hERG, DILI, carcinogenicity, mutagenicity, reproductive toxicity — pairwise
S24 DDI potential analysis			CYP inhibition probabilities and DDI score
S25 KB-268 spectra			IR, ¹H NMR, and LC-MS spectra of KB-268
S26 KB-270 spectra			IR, ¹H NMR, and LC-MS spectra of KB-270
S27 KB-292 spectra			IR, ¹H NMR, and LC-MS spectra of KB-292

## Sheet: S1 Docking Results
Table S1. CB-Dock2 blind docking results for all 15 compounds across 5 binding pockets of HDAC8 (PDB: 2V5X). Scores in kcal/mol; box dimensions in Å. Pockets sorted by score (best first) within each compound.
Pocket 1 (catalytic site (active site)): Vol 2020 Å³, centre (16.465, −0.699, 43.607) | Pocket 2: 685 Å³, (43.514, −5.102, 46.470) | Pocket 3: 578 Å³, (14.782, 5.288, 63.222) | Pocket 4: 508 Å³, (−7.945, 5.627, 39.880) | Pocket 5: 369 Å³, (32.684, 14.017, 71.257)
Compound	Pocket	Score (kcal/mol)	Box (x × y × z, Å)	Pocket volume (Å³)
KB-268	1	-8.8	18×24×25	2020
	3	-7.6	27×18×24	578
	5	-6.4	18×18×18	369
	2	-5.7	18×18×18	685
	4	-5.6	18×18×18	508
KB-269	1	-10.5	23×23×23	2020
	3	-9.4	23×23×23	578
	4	-6.9	23×23×23	508
	2	-6.7	23×23×23	685
	5	-6.7	23×23×23	369
KB-270	1	-10	23×23×23	2020
	3	-8.8	23×23×23	578
	5	-7.2	23×23×23	369
	4	-6.9	23×23×23	508
	2	-6.8	23×23×23	685
KB-271	1	-10.4	23×23×23	2020
	3	-8.9	23×23×23	578
	5	-7.4	23×23×23	369
	4	-5.9	23×23×23	508
	2	-5.7	23×23×23	685
KB-272	1	-8.5	19×19×25	2020
	3	-7.1	27×19×19	578
	5	-6	19×19×19	369
	2	-5.9	19×19×19	685
	4	-5.7	19×19×19	508
KB-280	1	-10.4	21×21×21	2020
	3	-8.2	27×21×21	578
	2	-6.7	21×21×21	685
	5	-6.6	21×21×21	369
	4	-6.2	21×21×21	508
KB-281	1	-11	22×22×22	2020
	3	-9.1	22×22×22	578
	2	-8.1	22×22×22	685
	5	-7.8	22×22×22	369
	4	-7.5	22×22×22	508
KB-282	1	-12.3	23×23×23	2020
	3	-10.2	23×23×23	578
	5	-8.1	23×23×23	369
	4	-7.1	23×23×23	508
	2	-6.9	23×23×23	685
KB-283	1	-8.5	20×20×20	2020
	3	-6.9	27×20×20	578
	5	-6.3	20×20×20	369
	2	-6.1	20×20×20	685
	4	-5.9	20×20×20	508
KB-292	1	-8.7	20×20×20	2020
	2	-7.2	20×20×20	685
	3	-6.5	27×20×20	578
	5	-6.5	20×20×20	369
	4	-5.7	20×20×20	508
NCC149	1	-8.9	24×24×24	2020
	3	-7.9	24×24×24	578
	2	-6.6	24×24×24	685
	5	-6.2	24×24×24	369
	4	-5.7	24×24×24	508
PCI-34051	1	-8.8	20×20×20	2020
	2	-6.9	20×20×20	685
	3	-6.7	27×20×20	578
	4	-6.4	20×20×20	508
	5	-6.3	20×20×20	369
Entinostat	1	-8.4	26×26×26	2020
	3	-7.6	26×26×26	578
	2	-6.4	26×26×26	685
	5	-6.3	26×26×26	369
	4	-5.9	26×26×26	508
Octanediamide	1	-10.8	27×27×27	2020
	3	-9.6	27×27×27	578
	4	-6.7	27×27×27	508
	5	-6.3	27×27×27	369
	2	-6.2	27×27×27	685
p53-derived	1	-8.4	28×28×28	2020
	3	-8.1	28×28×28	578
	2	-5.8	28×28×28	685
	4	-5.6	28×28×28	508
	5	-5.6	28×28×28	369

## Sheet: S2 Scores Matrix
Table S2. Summary matrix of CB-Dock2 docking scores (kcal/mol) for all 15 compounds × 5 pockets. Scores for Pocket 1 (primary catalytic site (active site)) are highlighted.
Compound	Pocket 1 (2020 Å³)	Pocket 2 (685 Å³)	Pocket 3 (578 Å³)	Pocket 4 (508 Å³)	Pocket 5 (369 Å³)	Best score (any pocket)
KB-268	-8.8	-5.7	-7.6	-5.6	-6.4	-8.8
KB-269	-10.5	-6.7	-9.4	-6.9	-6.7	-10.5
KB-270	-10	-6.8	-8.8	-6.9	-7.2	-10
KB-271	-10.4	-5.7	-8.9	-5.9	-7.4	-10.4
KB-272	-8.5	-5.9	-7.1	-5.7	-6	-8.5
KB-280	-10.4	-6.7	-8.2	-6.2	-6.6	-10.4
KB-281	-11	-8.1	-9.1	-7.5	-7.8	-11
KB-282	-12.3	-6.9	-10.2	-7.1	-8.1	-12.3
KB-283	-8.5	-6.1	-6.9	-5.9	-6.3	-8.5
KB-292	-8.7	-7.2	-6.5	-5.7	-6.5	-8.7
NCC149	-8.9	-6.6	-7.9	-5.7	-6.2	-8.9
PCI-34051	-8.8	-6.9	-6.7	-6.4	-6.3	-8.8
Entinostat	-8.4	-6.4	-7.6	-5.9	-6.3	-8.4
Octanediamide	-10.8	-6.2	-9.6	-6.7	-6.3	-10.8
p53-derived	-8.4	-5.8	-8.1	-5.6	-5.6	-8.4

## Sheet: S3 AA Composition P1
Table S3. Amino acid residue frequency in Pocket 1 (catalytic site (active site), Vol 2020 Å³) of HDAC8 for each compound. Top 5 most frequent residue types and counts (both chains combined).
Compound	Score P1 (kcal/mol)	PHE	ASP	HIS	GLY	LYS	Top-5 residues
KB-268	-8.8	6	3	2	3	2	PHE(6), ASP(3), GLY(3), LYS(2), HIS(2)
KB-269	-10.5	5	4	4	5	2	GLY(5), PHE(5), ASP(4), HIS(4), LYS(2)
KB-270	-10	6	4	4	5	2	PHE(6), GLY(5), TYR(4), ASP(4), HIS(4)
KB-271	-10.4	6	4	4	3	2	PHE(6), ASP(4), HIS(4), GLY(3), LYS(2)
KB-272	-8.5	6	2	3	1	2	PHE(6), HIS(3), LYS(2), ASP(2), PRO(2)
KB-280	-10.4	6	3	3	3	2	PHE(6), ASP(3), HIS(3), GLY(3), LYS(2)
KB-281	-11	6	5	3	2	4	PHE(6), ASP(5), LYS(4), HIS(3), GLY(2)
KB-282	-12.3	6	8	5	2	4	ASP(8), PHE(6), HIS(5), LYS(4), GLY(2)
KB-283	-8.5	4	4	3	2	1	ASP(4), PHE(4), HIS(3), GLY(2), PRO(2)
KB-292	-8.7	6	7	6	7	2	ASP(7), GLY(7), HIS(6), PHE(6), PRO(3)
NCC149	-8.9	6	7	6	6	4	ASP(7), HIS(6), GLY(6), PHE(6), LYS(4)
PCI-34051	-8.8	6	6	6	6	3	ASP(6), HIS(6), GLY(6), PHE(6), TYR(3)
Entinostat	-8.4	6	5	5	7	2	GLY(7), PHE(6), ASP(5), HIS(5), TYR(3)
Octanediamide	-10.8	6	5	5	6	4	GLY(6), PHE(6), ASP(5), HIS(5), LYS(4)
p53-derived	-8.4	6	8	6	7	3	ASP(8), GLY(7), HIS(6), PHE(6), PRO(4)

## Sheet: S4 Interactions
Table S4. Molecular interaction profile: KB-282 vs octanediamide (template and blind docking) in HDAC8 Pocket 1
Substance / condition	Interacting residues	Distance (Å)	Bond category	Bond type
Octanediamide (template)	A:TYR306:OH – A:UNL1:O	2.459	Hydrogen bond	Conventional H-bond
	A:UNL1:H – A:ASP101:OD2	2.4	Hydrogen bond	Conventional H-bond
	A:UNL1:H – A:ASP178:OD2	2.529	Hydrogen bond	Conventional H-bond
	B:MET274:CG – A:UNL1	3.846	Hydrophobic	Pi-Sigma
	B:TYR306 – A:UNL1	4.35	Hydrophobic	Pi-Pi stacked
	A:UNL1 – B:TYR306	4.99	Hydrophobic	Pi-Pi stacked
	A:PHE208 – A:UNL1	4.88	Hydrophobic	Pi-Pi T-shaped
	A:UNL1 – A:PHE208	4.97	Hydrophobic	Pi-Pi T-shaped
	A:UNL1 – B:MET274	5.454	Hydrophobic	Pi-Alkyl
	A:UNL1 – B:LYS33	4.98	Hydrophobic	Pi-Alkyl
	A:UNL1 – A:MET274	5.207	Hydrophobic	Pi-Alkyl
Octanediamide (blind docking)	A:HIS180:ND1 – A:UNL1:O	2.939	Hydrogen bond	Conventional H-bond
	A:GLY304:N – A:UNL1:O	2.991	Hydrogen bond	Conventional H-bond
	A:UNL1:H – B:LYS33:O	2.885	Hydrogen bond	Conventional H-bond
	A:UNL1:H – A:MET274:SD	2.635	Hydrogen bond	Conventional H-bond
	A:UNL1:H – A:TYR306:OH	2.351	Hydrogen bond	Conventional H-bond
	A:UNL1:C – A:PRO273:O	3.51	Hydrogen bond	Carbon H-bond
	A:UNL1:C – A:MET274:O	3.71	Hydrogen bond	Carbon H-bond
	A:UNL1:C – A:HIS180	3.693	Hydrophobic	Pi-Sigma
	A:MET274:SD – A:UNL1	5.699	Other	Pi-Sulfur
	B:MET274:SD – A:UNL1	5.209	Other	Pi-Sulfur
	B:TYR306 – A:UNL1	3.875	Hydrophobic	Pi-Pi stacked
	A:UNL1 – A:UNL1	4.991	Hydrophobic	Pi-Pi T-shaped
	A:UNL1 – B:LEU308	5.199	Hydrophobic	Pi-Alkyl
	A:UNL1 – A:PRO273	4.328	Hydrophobic	Pi-Alkyl
KB-282 (blind docking)	B:ASP101:OD1 – A:UNL1	4.223	Electrostatic	Pi-Anion
	B:ASP101:OD2 – A:UNL1	4.056	Electrostatic	Pi-Anion
	B:MET274:SD – A:UNL1	5.457	Other	Pi-Sulfur
	B:PHE152 – A:UNL1	4.141	Hydrophobic	Pi-Pi stacked
	B:PHE208 – A:UNL1	4.751	Hydrophobic	Pi-Pi stacked
	B:TYR306 – A:UNL1	3.883	Hydrophobic	Pi-Pi stacked
	A:UNL1 – A:PRO273	5.105	Hydrophobic	Pi-Alkyl
	A:UNL1 – A:PRO273	4.497	Hydrophobic	Pi-Alkyl

## Sheet: S5 Residues — all pockets
Table S5. Complete amino acid residue listings (Chain A and Chain B) for all 5 binding pockets of HDAC8 (PDB: 2V5X) per compound, from CB-Dock2 blind docking.
Compound	Pocket (ID)	Score (kcal/mol)	Chain A residues	Chain B residues
KB-268	1	-8.8	LYS:33, ASP:101, GLY:151, PHE:152, HIS:180, PHE:207, PHE:208, ASP:272, PRO:273, MET:274, TYR:306	LYS:33, ASP:101, GLY:151, PHE:152, HIS:180, GLY:206, PHE:207, PHE:208, PRO:273, MET:274, TYR:306
	3	-7.6	ALA:32, LYS:33, GLY:86, ASP:87, ASP:88, ASP:89, GLY:99, TYR:100, ASP:101, PRO:103, ALA:104, THR:105, GLU:106, PHE:152, MET:274, TYR:306	SER:26, ASP:29, SER:30, LEU:31, ALA:32, LYS:33, PRO:35, LYS:36, THR:105, PHE:152, PRO:273, MET:274, TYR:306
	5	-6.4	SER:21, GLU:23, TYR:24, SER:26, MET:27, LYS:58, PRO:59, VAL:61, ALA:62, SER:63, MET:64, GLU:65, MET:67, GLN:80, PHE:109, ASP:110, TYR:111, ALA:113, ALA:114	—
	2	-5.7	ASP:237, THR:280, PRO:281, VAL:282, LYS:289, TYR:317, VAL:321, LYS:325, THR:326, LEU:327, SER:328, SER:329, LEU:346, GLU:347, ILE:348, THR:349, PRO:350	—
	4	-5.6	—	VAL:282, LYS:289, TYR:317, VAL:321, LYS:325, THR:326, LEU:327, SER:328, SER:329, LEU:346, GLU:347
KB-269	1	-10.5	LYS:33, ASP:101, HIS:143, GLY:151, PHE:152, HIS:180, GLY:206, PHE:207, PHE:208, ASP:272, PRO:273, MET:274, TYR:306	LYS:33, ASP:101, HIS:143, GLY:151, PHE:152, HIS:180, GLY:206, PHE:208, GLY:271, ASP:272, PRO:273, MET:274, TYR:306, ASN:307
	3	-9.4	ALA:32, LYS:33, ILE:34, PRO:35, GLY:86, ASP:87, ASP:88, ASP:89, ILE:94, GLY:99, TYR:100, ASP:101, PRO:103, THR:105, GLU:106, PHE:152, PRO:273, MET:274, TYR:306, LEU:308	SER:26, ASP:29, SER:30, LEU:31, ALA:32, LYS:33, ILE:34, PRO:35, LYS:36, MET:40, GLY:99, TYR:100, ASP:101, PRO:103, THR:105, GLU:106, PHE:152, PRO:273, TYR:306, ASN:307, LEU:308, ALA:309, PHE:336, THR:338, ALA:339, GLY:341
	4	-6.9	—	GLN:236, ASP:237, GLU:238, TYR:241, THR:280, VAL:282, LYS:286, LYS:289, TYR:317, GLY:324, LYS:325, THR:326, LEU:327, SER:328, SER:329, VAL:345, LEU:346, GLU:347, ILE:348, THR:349, PRO:350
	2	-6.7	GLN:236, ASP:237, GLU:238, TYR:241, THR:280, PRO:281, VAL:282, LYS:286, LYS:289, TYR:290, LEU:292, GLN:293, ARG:313, TYR:317, GLY:320, VAL:321, ILE:322, GLY:324, LYS:325, THR:326, LEU:327, SER:328, SER:329, LEU:346, GLU:347, ILE:348, THR:349, PRO:350	—
	5	-6.7	SER:21, GLU:23, TYR:24, SER:26, MET:27, LYS:58, PRO:59, LYS:60, VAL:61, ALA:62, SER:63, MET:64, GLU:65, MET:67, GLN:80, SER:83, GLN:84, GLU:85, GLU:106, GLY:107, PHE:109, ASP:110, TYR:111, ALA:113, ALA:114	—
KB-270	1	-10	LYS:33, TYR:100, ASP:101, HIS:143, GLY:151, PHE:152, HIS:180, PHE:207, PHE:208, GLY:271, ASP:272, PRO:273, MET:274, TYR:306, ASN:307	LYS:33, TYR:100, ASP:101, HIS:143, GLY:151, PHE:152, HIS:180, GLY:206, PHE:207, PHE:208, PRO:209, GLY:210, ASP:272, PRO:273, MET:274, TYR:306
	3	-8.8	SER:30, ALA:32, LYS:33, PRO:35, ASP:87, ASP:88, ASP:89, GLY:99, TYR:100, ASP:101, PRO:103, THR:105, GLU:106, PHE:152, ASP:272, PRO:273, MET:274, TYR:306, LEU:308	SER:26, MET:27, ASP:29, SER:30, LEU:31, ALA:32, LYS:33, PRO:35, LYS:36, GLY:99, TYR:100, ASP:101, PRO:103, THR:105, GLU:106, GLY:107, ILE:108, TYR:111, PHE:152, TYR:154, PRO:273, TYR:306
	5	-7.2	SER:21, GLU:23, TYR:24, SER:26, MET:27, SER:30, LYS:58, PRO:59, LYS:60, VAL:61, ALA:62, SER:63, MET:64, MET:67, GLN:80, SER:83, GLN:84, GLU:106, GLY:107, PHE:109, ASP:110, TYR:111, ALA:113, ALA:114	—
	4	-6.9	—	GLN:236, ASP:237, GLU:238, TYR:241, THR:280, VAL:282, GLY:283, LYS:286, LYS:289, TYR:290, TYR:317, GLY:320, VAL:321, GLY:324, LYS:325, THR:326, LEU:327, SER:328, SER:329, ASP:343, VAL:345, LEU:346, GLU:347, ILE:348, THR:349, PRO:350
	2	-6.8	GLN:236, ASP:237, GLU:238, THR:280, PRO:281, VAL:282, GLY:283, LYS:286, LYS:289, TYR:317, GLY:320, VAL:321, GLY:324, LYS:325, THR:326, LEU:327, SER:328, SER:329, LEU:346, GLU:347, ILE:348, THR:349, PRO:350	—
KB-271	1	-10.4	LYS:33, ASP:101, HIS:143, GLY:151, PHE:152, HIS:180, PHE:207, PHE:208, ASP:272, PRO:273, MET:274, CYS:275, TYR:306	LYS:33, ASP:101, HIS:143, GLY:151, PHE:152, HIS:180, GLY:206, PHE:207, PHE:208, ASP:272, PRO:273, MET:274, TYR:306
	3	-8.9	ALA:32, LYS:33, PRO:35, GLY:86, ASP:87, ASP:88, ASP:89, ILE:94, GLY:97, LEU:98, GLY:99, TYR:100, ASP:101, CYS:102, PRO:103, THR:105, GLU:106, GLU:148, ALA:149, SER:150, GLY:151, PHE:152, PHE:208, PRO:273, TYR:306, ASN:307, LEU:308	MET:27, ASP:29, SER:30, LEU:31, ALA:32, LYS:33, ILE:34, PRO:35, LYS:36, MET:40, GLY:99, TYR:100, ASP:101, PRO:103, ALA:104, THR:105, GLU:106, GLY:107, ILE:108, TYR:111, PHE:152, TYR:154, PRO:273, MET:274, TYR:306, LEU:308, ALA:309, ALA:339
	5	-7.4	SER:21, GLU:23, TYR:24, MET:27, LYS:58, PRO:59, LYS:60, VAL:61, ALA:62, SER:63, MET:64, MET:67, GLN:80, PHE:109, ASP:110, TYR:111, ALA:113, ALA:114	—
	4	-5.9	—	GLN:236, ASP:237, GLU:238, THR:280, VAL:282, GLY:283, LYS:286, LYS:289, TYR:317, LYS:325, THR:326, LEU:327, SER:328, SER:329, VAL:345, LEU:346, GLU:347, ILE:348, THR:349, PRO:350
	2	-5.7	GLN:236, ASP:237, GLU:238, TYR:241, THR:280, PRO:281, VAL:282, LYS:286, CYS:287, LYS:289, TYR:290, ILE:291, LEU:292, GLN:293, TYR:317, VAL:321, GLY:324, LYS:325, THR:326, LEU:327, SER:328, SER:329, LEU:346, GLU:347, ILE:348, THR:349, PRO:350	—
KB-272	1	-8.5	LYS:33, ASP:101, PHE:152, HIS:180, PHE:207, PHE:208, PRO:273, MET:274, TYR:306	LYS:33, ASP:101, HIS:143, GLY:151, PHE:152, HIS:180, PHE:207, PHE:208, PRO:273, MET:274, TYR:306
	3	-7.1	ALA:32, LYS:33, GLY:86, ASP:87, ASP:88, ASP:89, GLY:99, TYR:100, PRO:103, THR:105, GLU:106	SER:26, ASP:29, SER:30, LEU:31, ALA:32, PRO:35, LYS:36, GLU:106
	5	-6	SER:21, GLU:23, TYR:24, SER:26, MET:27, LYS:58, PRO:59, LYS:60, VAL:61, ALA:62, SER:63, MET:64, GLU:65, MET:67, GLN:80, PHE:109, ASP:110, TYR:111, ALA:113, ALA:114	—
	2	-5.9	GLN:236, ASP:237, THR:280, PRO:281, VAL:282, LYS:289, TYR:317, VAL:321, LYS:325, THR:326, LEU:327, SER:328, SER:329, LEU:346, GLU:347, ILE:348, THR:349, PRO:350	—
	4	-5.7	—	VAL:282, LYS:289, TYR:317, VAL:321, GLY:324, LYS:325, THR:326, LEU:327, SER:328, SER:329, LEU:346, GLU:347
KB-280	1	-10.4	LYS:33, ASP:101, HIS:143, GLY:151, PHE:152, HIS:180, GLY:206, PHE:207, PHE:208, ASP:272, PRO:273, MET:274, CYS:275, SER:276, TYR:306	LYS:33, ASP:101, GLY:151, PHE:152, HIS:180, PHE:207, PHE:208, PRO:273, MET:274, SER:276, TYR:306
	3	-8.2	SER:30, ALA:32, LYS:33, GLY:86, ASP:87, ASP:88, ASP:89, GLY:99, TYR:100, PRO:103, ALA:104, THR:105, GLU:106	SER:26, MET:27, ASP:29, SER:30, LEU:31, ALA:32, PRO:35, LYS:36, PRO:103, THR:105, GLU:106, GLY:107, ILE:108, TYR:111
	2	-6.7	GLN:236, ASP:237, GLU:238, TYR:241, THR:280, PRO:281, VAL:282, GLY:285, LYS:286, LYS:289, TYR:290, GLN:293, TYR:317, VAL:321, LYS:325, THR:326, LEU:327, SER:328, SER:329, LEU:346, GLU:347, ILE:348, THR:349, PRO:350	—
	5	-6.6	SER:21, GLU:23, TYR:24, SER:26, MET:27, LYS:58, PRO:59, LYS:60, VAL:61, ALA:62, SER:63, MET:64, MET:67, GLY:107, PHE:109, ASP:110, TYR:111, ALA:113, ALA:114	—
	4	-6.2	—	GLN:236, ASP:237, GLU:238, THR:280, VAL:282, LYS:286, LYS:289, TYR:317, GLY:320, VAL:321, GLY:324, LYS:325, THR:326, LEU:327, SER:328, SER:329, LEU:346, GLU:347, ILE:348, THR:349, PRO:350
KB-281	1	-11	LYS:33, ASP:101, HIS:143, GLY:151, PHE:152, HIS:180, LYS:202, PHE:207, PHE:208, ASP:267, ASP:272, PRO:273, MET:274, CYS:275, SER:276, TYR:306	LYS:33, ASP:101, PHE:152, LEU:179, HIS:180, LYS:202, GLY:206, PHE:207, PHE:208, ASP:272, PRO:273, MET:274, CYS:275, SER:276, TYR:306
	3	-9.1	ASP:29, SER:30, LEU:31, ALA:32, LYS:33, PRO:35, GLY:86, ASP:87, ASP:88, ASP:89, GLY:99, TYR:100, ASP:101, PRO:103, ALA:104, THR:105, GLU:106, GLY:107, ILE:108, TYR:111, TYR:154	SER:26, ASP:29, SER:30, LEU:31, ALA:32, LYS:33, PRO:35, LYS:36, GLY:99, TYR:100, ASP:101, CYS:102, PRO:103, THR:105, GLU:106, ILE:108, TYR:111, TYR:154
	2	-8.1	ASP:237, THR:280, PRO:281, VAL:282, LYS:286, LYS:289, TYR:317, GLY:320, VAL:321, GLY:324, LYS:325, THR:326, LEU:327, SER:328, SER:329, LEU:346, GLU:347, ILE:348, THR:349, PRO:350	—
	5	-7.8	SER:21, GLU:23, TYR:24, SER:26, MET:27, LYS:58, PRO:59, LYS:60, VAL:61, ALA:62, SER:63, ASP:110, ALA:113, ALA:114	—
	4	-7.5	—	ASP:237, THR:280, PRO:281, VAL:282, LYS:286, LYS:289, ARG:313, TYR:317, GLY:320, VAL:321, GLY:324, LYS:325, THR:326, LEU:327, SER:328, SER:329, VAL:345, LEU:346, GLU:347, ILE:348, THR:349, PRO:350
KB-282	1	-12.3	LYS:33, ASP:101, HIS:142, HIS:143, GLY:151, PHE:152, ASP:178, HIS:180, LYS:202, PHE:207, PHE:208, ASP:233, ASP:267, ASP:272, PRO:273, MET:274, CYS:275, SER:276, TYR:306	LYS:33, ASP:101, HIS:143, GLY:151, PHE:152, HIS:180, LYS:202, PHE:207, PHE:208, ASP:233, ASP:267, PRO:273, MET:274, CYS:275, SER:276, TYR:306
	3	-10.2	SER:30, ALA:32, LYS:33, ILE:34, PRO:35, ASP:87, ASP:88, ASP:89, GLY:99, TYR:100, ASP:101, PRO:103, THR:105, GLU:106, PHE:152, PRO:273, MET:274, TYR:306, LEU:308	ASP:29, SER:30, LEU:31, ALA:32, LYS:33, ILE:34, PRO:35, LYS:36, GLY:99, TYR:100, ASP:101, PRO:103, THR:105, PHE:152, PRO:273, MET:274, TYR:306, LEU:308
	5	-8.1	SER:21, GLU:23, TYR:24, SER:26, MET:27, LYS:58, PRO:59, LYS:60, VAL:61, ALA:62, SER:63, MET:64, GLU:65, MET:67, GLN:80, SER:83, GLN:84, GLY:107, PHE:109, ASP:110, ALA:113, ALA:114	—
	4	-7.1	—	GLN:236, ASP:237, GLU:238, LYS:239, THR:280, VAL:282, LYS:286, LYS:289, TYR:317, GLY:320, VAL:321, LYS:325, THR:326, LEU:327, SER:328, SER:329, VAL:345, LEU:346, GLU:347, ILE:348, THR:349, PRO:350
	2	-6.9	GLN:236, ASP:237, GLU:238, LYS:239, TYR:241, THR:280, PRO:281, VAL:282, LYS:286, LYS:289, TYR:290, LEU:292, GLN:293, TYR:317, VAL:321, ILE:322, LYS:325, THR:326, LEU:327, SER:328, SER:329, LEU:346, GLU:347, ILE:348, THR:349, PRO:350	—
KB-283	1	-8.5	ASP:101, HIS:143, GLY:151, PHE:152, HIS:180, GLY:206, PHE:207, PHE:208, ASP:272, PRO:273, MET:274, SER:276, TYR:306	LYS:33, ASP:101, PHE:152, HIS:180, ASP:272, PRO:273, MET:274, CYS:275, TYR:306
	3	-6.9	ALA:32, LYS:33, GLY:86, ASP:87, ASP:88, ASP:89, GLY:99, TYR:100, PRO:103, ALA:104, THR:105, GLU:106	SER:26, ASP:29, SER:30, LEU:31, ALA:32, PRO:35, LYS:36, THR:105, GLU:106
	5	-6.3	SER:21, GLU:23, TYR:24, SER:26, MET:27, LYS:58, PRO:59, LYS:60, VAL:61, ALA:62, SER:63, MET:64, GLU:65, MET:67, GLN:80, PHE:109, ASP:110, TYR:111, ALA:113, ALA:114	—
	2	-6.1	VAL:282, GLY:285, LYS:286, LYS:289, TYR:317, GLY:320, VAL:321, LYS:325, THR:326, LEU:327, SER:328, SER:329, LEU:346, GLU:347	—
	4	-5.9	—	GLN:236, ASP:237, GLU:238, THR:280, VAL:282, LYS:289, TYR:317, VAL:321, LYS:325, THR:326, LEU:327, SER:328, SER:329, VAL:345, LEU:346, GLU:347, ILE:348, THR:349, PRO:350
KB-292	1	-8.7	ASP:101, TRP:141, HIS:142, HIS:143, GLY:151, PHE:152, ASP:178, HIS:180, LYS:202, GLY:206, PHE:207, PHE:208, PRO:209, ASP:267, PRO:273, MET:274, CYS:275, SER:276, GLY:304, TYR:306	LYS:33, ASP:101, TRP:141, HIS:142, HIS:143, GLY:151, PHE:152, ASP:178, HIS:180, GLY:206, PHE:207, PHE:208, ASP:267, GLY:271, ASP:272, PRO:273, MET:274, CYS:275, SER:276, GLY:304, TYR:306
	2	-7.2	ASP:237, THR:280, PRO:281, VAL:282, LYS:286, LYS:289, TYR:317, VAL:321, LYS:325, THR:326, LEU:327, SER:328, SER:329, LEU:346, GLU:347, ILE:348, THR:349, PRO:350	—
	3	-6.5	ALA:32, LYS:33, GLY:86, ASP:87, ASP:88, ASP:89, GLY:99, TYR:100, PRO:103, ALA:104, THR:105, GLU:106	ASP:29, SER:30, LEU:31, ALA:32, PRO:35, LYS:36, THR:105, GLU:106
	5	-6.5	SER:21, GLU:23, TYR:24, MET:27, LYS:58, PRO:59, LYS:60, VAL:61, ALA:62, SER:63, MET:64, MET:67, PHE:109, ASP:110, TYR:111, ALA:113, ALA:114	—
	4	-5.7	—	ASP:237, GLU:238, THR:280, VAL:282, LYS:286, LYS:289, TYR:317, VAL:321, GLY:324, LYS:325, THR:326, LEU:327, SER:328, SER:329, LEU:346, GLU:347, ILE:348, PRO:350
NCC149	1	-8.9	LYS:33, TYR:100, ASP:101, TRP:141, HIS:142, HIS:143, GLY:151, PHE:152, HIS:180, LYS:202, PHE:207, PHE:208, ASP:233, ASP:267, PRO:273, MET:274, CYS:275, SER:276, GLY:303, GLY:304, TYR:306	LYS:33, ILE:34, PRO:35, ASP:101, TRP:141, HIS:142, HIS:143, GLY:151, PHE:152, CYS:153, ASP:178, HIS:180, LYS:202, PHE:207, PHE:208, ASP:233, ASP:267, PRO:273, MET:274, CYS:275, SER:276, GLY:304, GLY:305, TYR:306, LEU:308
	3	-7.9	ALA:32, LYS:33, ILE:34, PRO:35, ASP:88, GLY:97, LEU:98, GLY:99, TYR:100, ASP:101, CYS:102, PRO:103, HIS:143, GLY:151, PHE:152, HIS:180, PHE:208, PRO:273, MET:274, GLY:305, TYR:306, ASN:307, LEU:308	ALA:32, LYS:33, ILE:34, PRO:35, GLY:99, TYR:100, ASP:101, CYS:102, PRO:103, PHE:152, PRO:273, MET:274, GLY:305, TYR:306, ASN:307, LEU:308
	2	-6.6	GLN:236, ASP:237, GLU:238, TYR:241, THR:280, PRO:281, VAL:282, GLY:283, LYS:286, CYS:287, LYS:289, TYR:290, LEU:292, GLN:293, ARG:313, TYR:317, VAL:321, ILE:322, GLY:324, LYS:325, THR:326, LEU:327, SER:328, SER:329, LEU:346, GLU:347, ILE:348, THR:349, PRO:350	—
	5	-6.2	SER:21, GLU:23, TYR:24, SER:26, MET:27, LYS:58, PRO:59, LYS:60, VAL:61, ALA:62, SER:63, MET:64, MET:67, GLN:80, PHE:109, ASP:110, ALA:113, ALA:114	—
	4	-5.7	—	GLN:236, ASP:237, GLU:238, LYS:239, TYR:241, ASN:278, THR:280, VAL:282, GLY:285, LYS:286, CYS:287, LEU:288, LYS:289, TYR:290, LEU:292, GLN:293, TYR:317, GLY:320, VAL:321, ILE:322, LEU:323, GLY:324, LYS:325, THR:326, LEU:327, SER:328, SER:329, ASP:343, VAL:345, LEU:346, GLU:347, ILE:348, THR:349, PRO:350
PCI-34051	1	-8.8	TYR:100, ASP:101, TRP:141, HIS:142, HIS:143, GLY:151, PHE:152, ASP:178, HIS:180, LYS:202, GLY:206, PHE:207, PHE:208, ASP:267, PRO:273, MET:274, CYS:275, SER:276, GLY:304, TYR:306	LYS:33, ASP:101, TRP:141, HIS:142, HIS:143, SER:150, GLY:151, PHE:152, CYS:153, ASP:178, HIS:180, LYS:202, PHE:207, PHE:208, ASP:267, PRO:273, MET:274, CYS:275, SER:276, GLY:304, GLY:305, TYR:306
	2	-6.9	ASP:237, THR:280, PRO:281, VAL:282, GLY:283, LYS:286, LYS:289, TYR:317, GLY:320, VAL:321, LYS:325, THR:326, LEU:327, SER:328, SER:329, LEU:346, GLU:347, ILE:348, THR:349, PRO:350	—
	3	-6.7	ALA:32, LYS:33, ILE:34, PRO:35, GLY:86, ASP:87, ASP:88, ASP:89, GLY:99, TYR:100, ASP:101, PRO:103, ALA:104, THR:105, GLU:106, PHE:152, TYR:306, LEU:308	SER:26, MET:27, ASP:29, SER:30, LEU:31, ALA:32, LYS:33, ILE:34, PRO:35, LYS:36, TYR:100, PRO:103, THR:105, PHE:152, TYR:306, LEU:308
	4	-6.4	—	GLN:236, ASP:237, GLU:238, THR:280, PRO:281, VAL:282, GLY:283, LYS:286, LYS:289, ARG:313, CYS:314, THR:316, TYR:317, LEU:318, GLY:320, VAL:321, LYS:325, THR:326, LEU:327, SER:328, SER:329, ASP:343, VAL:345, LEU:346, GLU:347, ILE:348, THR:349, PRO:350
	5	-6.3	TYR:20, SER:21, GLU:23, TYR:24, SER:26, MET:27, LYS:58, PRO:59, LYS:60, VAL:61, ALA:62, SER:63, MET:64, GLU:65, MET:67, GLN:80, PHE:109, ASP:110, TYR:111, ALA:113, ALA:114, ILE:115, GLY:117, ALA:118	—
Entinostat	1	-8.4	LYS:33, TYR:100, ASP:101, HIS:143, GLY:151, PHE:152, HIS:180, PHE:207, PHE:208, ASP:267, PRO:273, MET:274, SER:276, TYR:306	ALA:32, LYS:33, ILE:34, PRO:35, ASP:101, TRP:141, HIS:142, HIS:143, GLY:151, PHE:152, CYS:153, ASP:178, HIS:180, GLY:206, PHE:207, PHE:208, ASP:267, GLY:271, PRO:273, MET:274, SER:276, GLY:303, GLY:304, GLY:305, TYR:306, ASN:307, LEU:308, ALA:309
	3	-7.6	ALA:32, LYS:33, ILE:34, PRO:35, TYR:100, ASP:101, HIS:143, GLY:151, PHE:152, HIS:180, PHE:208, ASP:267, ASP:272, PRO:273, MET:274, GLY:305, TYR:306, ASN:307, LEU:308	ALA:32, LYS:33, ILE:34, PRO:35, GLY:99, TYR:100, ASP:101, PRO:103, PHE:152, HIS:180, PRO:273, MET:274, TYR:306, ASN:307, LEU:308
	2	-6.4	VAL:15, PRO:16, GLN:53, VAL:133, ASP:237, GLU:238, TYR:241, GLU:245, THR:280, PRO:281, VAL:282, GLY:283, LYS:286, LEU:288, LYS:289, TYR:290, LEU:292, GLN:293, TRP:294, GLN:295, TYR:317, VAL:321, ILE:322, LEU:323, GLY:324, LYS:325, THR:326, LEU:327, LEU:346, GLU:347, ILE:348, THR:349, PRO:350	—
	5	-6.3	SER:21, GLU:23, TYR:24, SER:26, MET:27, SER:30, VAL:57, LYS:58, PRO:59, LYS:60, VAL:61, ALA:62, SER:63, MET:64, GLU:65, GLU:66, MET:67, GLN:80, SER:83, GLN:84, GLU:85, GLU:106, GLY:107, ILE:108, PHE:109, ASP:110, TYR:111, ALA:113, ALA:114, ALA:118, THR:121, GLN:124, CYS:125	—
	4	-5.9	—	LEU:14, PRO:16, TYR:48, ALA:49, LEU:50, GLN:53, LYS:132, VAL:133, GLN:236, ASP:237, GLU:238, TYR:241, GLU:245, THR:280, VAL:282, LYS:286, LYS:289, TYR:290, LEU:292, GLN:293, TRP:294, GLN:295, ARG:313, TYR:317, GLY:320, VAL:321, ILE:322, LEU:323, GLY:324, LYS:325, THR:326, LEU:327, SER:328, GLU:330, LEU:346, GLU:347, ILE:348, THR:349, PRO:350
Octanediamide	1	-10.8	LYS:33, TYR:100, ASP:101, GLY:140, TRP:141, HIS:142, HIS:143, GLY:151, PHE:152, CYS:153, ASP:178, HIS:180, LYS:202, PHE:207, PHE:208, GLN:263, ASP:267, ASP:272, PRO:273, MET:274, CYS:275, SER:276, GLY:303, GLY:304, TYR:306	ALA:32, LYS:33, ILE:34, PRO:35, ASP:101, HIS:143, GLY:151, PHE:152, HIS:180, LYS:202, PHE:207, PHE:208, PRO:273, MET:274, CYS:275, SER:276, GLY:305, TYR:306, ASN:307, LEU:308
	3	-9.6	ALA:32, LYS:33, ILE:34, PRO:35, TYR:100, ASP:101, GLY:140, TRP:141, HIS:142, HIS:143, GLY:151, PHE:152, CYS:153, ASP:178, HIS:180, PHE:208, GLN:263, ASP:267, ASP:272, PRO:273, MET:274, GLY:303, GLY:304, GLY:305, TYR:306, LEU:308	ALA:32, LYS:33, ILE:34, PRO:35, TYR:100, ASP:101, TRP:141, HIS:142, HIS:143, GLY:151, PHE:152, ASP:178, HIS:180, PHE:208, ASP:267, ASP:272, PRO:273, MET:274, GLY:304, GLY:305, TYR:306, ASN:307, LEU:308
	4	-6.7	—	LEU:14, VAL:15, PRO:16, LYS:132, VAL:133, GLN:236, ASP:237, GLU:238, TYR:241, GLU:245, THR:280, PRO:281, VAL:282, LYS:286, LYS:289, TYR:290, LEU:292, GLN:293, GLN:295, ARG:313, TYR:317, GLY:320, VAL:321, ILE:322, LEU:323, GLY:324, LYS:325, THR:326, LEU:327, SER:328, SER:329, VAL:345, LEU:346, GLU:347, ILE:348, THR:349, PRO:350
	5	-6.3	SER:21, PRO:22, GLU:23, TYR:24, SER:26, MET:27, SER:30, LEU:31, LYS:58, PRO:59, LYS:60, VAL:61, ALA:62, SER:63, MET:64, GLU:65, GLU:66, MET:67, GLN:80, SER:83, GLN:84, GLU:85, THR:105, GLU:106, GLY:107, ILE:108, PHE:109, ASP:110, TYR:111, ALA:113, ALA:114	—
	2	-6.2	GLN:53, GLN:236, ASP:237, GLU:238, TYR:241, THR:280, PRO:281, VAL:282, GLY:283, LYS:286, LYS:289, TYR:290, LEU:292, GLN:293, TYR:317, GLY:320, VAL:321, ILE:322, LEU:323, GLY:324, LYS:325, THR:326, LEU:327, SER:328, SER:329, GLU:330, VAL:345, LEU:346, GLU:347, ILE:348, THR:349, PRO:350, SER:351, CYS:352	—
p53-derived	1	-8.4	ALA:32, LYS:33, ILE:34, PRO:35, TYR:100, ASP:101, TRP:141, HIS:142, HIS:143, GLY:151, PHE:152, CYS:153, ASP:178, HIS:180, LYS:202, GLY:206, PHE:207, PHE:208, ASP:267, ASP:272, PRO:273, MET:274, CYS:275, SER:276, GLY:304, TYR:306, ASN:307, LEU:308	ALA:32, LYS:33, ILE:34, PRO:35, TYR:100, ASP:101, TRP:141, HIS:142, HIS:143, GLY:151, PHE:152, CYS:153, ASP:178, HIS:180, GLY:206, PHE:207, PHE:208, GLN:263, ASP:267, ASP:272, PRO:273, MET:274, CYS:275, SER:276, GLY:303, GLY:304, TYR:306, ASN:307, LEU:308
	3	-8.1	ALA:32, LYS:33, ILE:34, PRO:35, TYR:100, ASP:101, PHE:152, HIS:180, GLY:271, ASP:272, PRO:273, MET:274, TYR:306, ASN:307, LEU:308, ALA:309	LEU:31, ALA:32, LYS:33, ILE:34, PRO:35, GLY:99, TYR:100, ASP:101, CYS:102, PRO:103, THR:105, ILE:108, TRP:141, HIS:142, HIS:143, SER:150, GLY:151, PHE:152, CYS:153, TYR:154, ASP:178, HIS:180, PHE:208, ASP:267, ASP:272, PRO:273, MET:274, GLY:304, TYR:306
	2	-5.8	LEU:14, VAL:15, PRO:16, LYS:52, GLN:53, MET:54, LYS:132, VAL:133, GLN:236, ASP:237, GLU:238, TYR:241, GLU:245, THR:280, PRO:281, VAL:282, GLY:283, GLY:285, LYS:286, LEU:288, LYS:289, TYR:290, ILE:291, LEU:292, GLN:293, GLN:295, TYR:317, GLY:320, VAL:321, ILE:322, LEU:323, GLY:324, LYS:325, THR:326, LEU:327, SER:328, SER:329, LEU:346, GLU:347, ILE:348	—
	4	-5.6	—	LEU:14, VAL:15, PRO:16, GLN:53, LYS:132, VAL:133, GLN:236, ASP:237, GLU:238, TYR:241, THR:280, PRO:281, VAL:282, GLY:283, GLY:285, LYS:286, LYS:289, TYR:290, LEU:292, GLN:293, GLN:295, TYR:317, GLY:320, VAL:321, ILE:322, LEU:323, GLY:324, LYS:325, THR:326, LEU:327, SER:328, SER:329, LEU:346, GLU:347, ILE:348, THR:349, PRO:350
	5	-5.6	SER:21, PRO:22, GLU:23, TYR:24, SER:26, MET:27, ASP:29, SER:30, LYS:58, PRO:59, LYS:60, VAL:61, ALA:62, SER:63, MET:64, GLU:65, GLU:66, MET:67, GLN:80, SER:83, GLN:84, GLU:85, GLU:106, GLY:107, ILE:108, PHE:109, ASP:110, TYR:111, ALA:113, ALA:114	—

## Sheet: S6 AA Freq — all pockets
Table S6. Top-5 most frequent amino acid residue types per pocket per compound (both chains combined). Frequency = number of residue occurrences across Chain A and Chain B.
Compound	Pocket 1 Score	Pocket 1 Top-5 residues	Pocket 2 Score	Pocket 2 Top-5 residues	Pocket 3 Score	Pocket 3 Top-5 residues	Pocket 4 Score	Pocket 4 Top-5 residues	Pocket 5 Score	Pocket 5 Top-5 residues
KB-268	-8.8	PHE(6), ASP(3), GLY(3), LYS(2), HIS(2)	-5.7	THR(3), PRO(2), VAL(2), LYS(2), LEU(2)	-7.6	ASP(5), ALA(3), LYS(3), TYR(3), PRO(3)	-5.6	VAL(2), LYS(2), LEU(2), SER(2), TYR(1)	-6.4	SER(3), MET(3), ALA(3), GLU(2), TYR(2)
KB-269	-10.5	GLY(5), PHE(5), ASP(4), HIS(4), LYS(2)	-6.7	TYR(3), THR(3), LYS(3), LEU(3), GLN(2)	-9.4	PRO(6), ASP(6), ALA(4), GLY(4), TYR(4)	-6.9	THR(3), LYS(3), GLU(2), TYR(2), VAL(2)	-6.7	SER(4), GLU(4), MET(3), ALA(3), TYR(2)
KB-270	-10	PHE(6), GLY(5), TYR(4), ASP(4), HIS(4)	-6.8	THR(3), GLY(3), LYS(3), GLU(2), PRO(2)	-8.8	ASP(7), PRO(6), TYR(6), SER(3), LYS(3)	-6.9	TYR(3), THR(3), VAL(3), GLY(3), LYS(3)	-7.2	SER(5), MET(3), ALA(3), GLU(2), TYR(2)
KB-271	-10.4	PHE(6), ASP(4), HIS(4), GLY(3), LYS(2)	-5.7	TYR(3), THR(3), LYS(3), LEU(3), GLN(2)	-8.9	ALA(6), PRO(6), GLY(6), ASP(6), TYR(6)	-5.9	THR(3), LYS(3), GLU(2), VAL(2), LEU(2)	-7.4	MET(3), ALA(3), SER(2), TYR(2), LYS(2)
KB-272	-8.5	PHE(6), HIS(3), LYS(2), ASP(2), PRO(2)	-5.9	THR(3), PRO(2), VAL(2), LYS(2), LEU(2)	-7.1	ASP(4), ALA(2), LYS(2), GLY(2), PRO(2)	-5.7	VAL(2), LYS(2), LEU(2), SER(2), TYR(1)	-6	SER(3), MET(3), ALA(3), GLU(2), TYR(2)
KB-280	-10.4	PHE(6), ASP(3), HIS(3), GLY(3), LYS(2)	-6.7	TYR(3), THR(3), LYS(3), GLN(2), GLU(2)	-8.2	ASP(4), SER(3), ALA(3), GLY(3), PRO(3)	-6.2	THR(3), LYS(3), GLU(2), VAL(2), GLY(2)	-6.6	SER(3), MET(3), ALA(3), TYR(2), LYS(2)
KB-281	-11	PHE(6), ASP(5), LYS(4), HIS(3), GLY(2)	-8.1	THR(3), LYS(3), PRO(2), VAL(2), GLY(2)	-9.1	ASP(7), TYR(6), PRO(4), GLY(4), SER(3)	-7.5	THR(3), VAL(3), LYS(3), PRO(2), GLY(2)	-7.8	SER(3), ALA(3), LYS(2), GLU(1), TYR(1)
KB-282	-12.3	ASP(8), PHE(6), HIS(5), LYS(4), GLY(2)	-6.9	LYS(4), TYR(3), THR(3), LEU(3), GLN(2)	-10.2	PRO(6), ASP(6), TYR(4), LYS(3), LEU(3)	-7.1	LYS(4), THR(3), VAL(3), GLU(2), LEU(2)	-8.1	SER(4), MET(3), ALA(3), GLU(2), LYS(2)
KB-283	-8.5	ASP(4), PHE(4), HIS(3), GLY(2), PRO(2)	-6.1	LYS(3), VAL(2), GLY(2), LEU(2), SER(2)	-6.9	ASP(4), ALA(3), LYS(2), GLY(2), PRO(2)	-5.9	THR(3), VAL(3), GLU(2), LYS(2), LEU(2)	-6.3	SER(3), MET(3), ALA(3), GLU(2), TYR(2)
KB-292	-8.7	ASP(7), GLY(7), HIS(6), PHE(6), PRO(3)	-7.2	THR(3), LYS(3), PRO(2), VAL(2), LEU(2)	-6.5	ASP(4), ALA(3), LYS(2), GLY(2), PRO(2)	-5.7	LYS(3), GLU(2), THR(2), VAL(2), LEU(2)	-6.5	MET(3), ALA(3), SER(2), TYR(2), LYS(2)
NCC149	-8.9	ASP(7), HIS(6), GLY(6), PHE(6), LYS(4)	-6.6	TYR(3), THR(3), LYS(3), LEU(3), GLN(2)	-7.9	PRO(6), GLY(6), TYR(4), ASP(3), LEU(3)	-5.7	LEU(5), LYS(4), TYR(3), THR(3), VAL(3)	-6.2	SER(3), MET(3), ALA(3), LYS(2), GLU(1)
PCI-34051	-8.8	ASP(6), HIS(6), GLY(6), PHE(6), TYR(3)	-6.9	THR(3), LYS(3), PRO(2), VAL(2), GLY(2)	-6.7	ASP(5), PRO(4), TYR(4), ALA(3), LYS(3)	-6.4	THR(4), VAL(3), LYS(3), LEU(3), ASP(2)	-6.3	ALA(4), TYR(3), SER(3), MET(3), GLU(2)
Entinostat	-8.4	GLY(7), PHE(6), ASP(5), HIS(5), TYR(3)	-6.4	LEU(5), VAL(4), PRO(3), GLN(3), GLU(3)	-7.6	PRO(5), TYR(4), ASP(4), HIS(3), GLY(3)	-5.9	LEU(6), TYR(4), GLN(4), LYS(4), GLU(4)	-6.3	SER(5), GLU(5), ALA(4), MET(3), GLN(3)
Octanediamide	-10.8	GLY(6), PHE(6), ASP(5), HIS(5), LYS(4)	-6.2	LEU(4), GLN(3), GLU(3), TYR(3), THR(3)	-9.6	ASP(8), GLY(8), HIS(6), PRO(4), TYR(4)	-6.7	LEU(5), VAL(5), LYS(4), PRO(3), GLN(3)	-6.3	SER(5), GLU(5), MET(3), ALA(3), PRO(2)
p53-derived	-8.4	ASP(8), GLY(7), HIS(6), PHE(6), PRO(4)	-5.8	LEU(6), LYS(5), VAL(4), GLN(4), GLY(4)	-8.1	ASP(6), PRO(5), TYR(5), HIS(4), GLY(4)	-5.6	LEU(5), VAL(4), GLN(4), LYS(4), GLY(4)	-5.6	SER(5), GLU(5), MET(3), ALA(3), PRO(2)

## Sheet: S7 Absorption & Distrib
Table S7. Predicted absorption and distribution parameters for all compounds (admetSAR 3.0)
Compound	Caco-2 (log)	Caco-2 (prob)	HIA	MDCK	F50%	F30%	F20%	BBB	PPB (%)	VDss (−log L/kg)
KB-268	0.902	-4.625	0.981	0.642	0.599	0.853	0.925	0.889	91.2	-0.175
KB-269	0.344	-5.33	0.961	0.665	0.365	0.56	0.672	0.663	101.6	-0.414
KB-270	0.35	-5.345	0.958	0.673	0.301	0.476	0.599	0.635	102.6	-0.481
KB-271	0.239	-5.399	0.949	0.682	0.287	0.423	0.539	0.751	97.1	-0.299
KB-272	0.833	-4.807	0.972	0.746	0.542	0.71	0.836	0.882	92.8	-0.179
KB-280	0.515	-5.128	0.961	0.668	0.304	0.493	0.613	0.673	101.6	-0.427
KB-281	0.681	-5.077	0.972	0.661	0.455	0.706	0.787	0.735	105.7	-0.335
KB-282	0.619	-5.06	0.835	0.723	0.269	0.473	0.554	0.599	100.7	-0.883
KB-283	0.922	-4.732	0.964	0.754	0.51	0.742	0.825	0.826	102.6	-0.631
KB-292	0.93	-4.519	0.982	0.895	0.809	0.919	0.939	0.96	94.6	-0.225
NCC149	0.453	-5.121	0.982	0.556	0.447	0.687	0.831	0.884	93	-0.03
PCI-34051	0.122	-5.453	0.912	0.462	0.42	0.616	0.772	0.661	86.5	-0.281
Entinostat	0.286	-5.372	0.963	0.493	0.493	0.772	0.876	0.721	81.5	-0.081
Octanediamide	0.016	-6.243	0.775	0.319	0.074	0.14	0.262	0.215	90.4	-0.611
p53-derived	0.001	-7.03	0.143	0.244	0.099	0.115	0.157	0.155	15.4	-0.82

## Sheet: S8 Transporters
Table S8. Predicted transporter inhibition and substrate probabilities (admetSAR 3.0)
Compound	OATP1B1 inh	OATP1B3 inh	OATP2B1 inh	OCT1 inh	OCT2 inh	BCRP inh	BSEP inh	MATE1 inh	Pgp inh	Pgp sub
KB-268	0.937	0.966	0.121	0.254	0.233	0.326	0.587	0.109	0.315	0.172
KB-269	0.786	0.749	0.371	0.279	0.179	0.31	0.948	0.222	0.848	0.186
KB-270	0.785	0.754	0.372	0.269	0.171	0.334	0.938	0.223	0.828	0.163
KB-271	0.774	0.696	0.38	0.286	0.187	0.262	0.971	0.22	0.916	0.304
KB-272	0.946	0.966	0.123	0.138	0.152	0.1	0.629	0.078	0.258	0.116
KB-280	0.792	0.747	0.394	0.314	0.179	0.382	0.953	0.266	0.889	0.17
KB-281	0.751	0.727	0.383	0.333	0.143	0.588	0.973	0.173	0.914	0.208
KB-282	0.685	0.752	0.298	0.251	0.371	0.255	0.924	0.204	0.862	0.298
KB-283	0.862	0.917	0.152	0.226	0.245	0.27	0.858	0.099	0.717	0.201
KB-292	0.901	0.935	0.143	0.36	0.268	0.295	0.887	0.087	0.617	0.129
NCC149	0.941	0.939	0.205	0.348	0.241	0.327	0.76	0.219	0.533	0.214
PCI-34051	0.927	0.914	0.254	0.213	0.273	0.146	0.616	0.261	0.363	0.339
Entinostat	0.922	0.921	0.182	0.405	0.279	0.443	0.838	0.264	0.606	0.77
Octanediamide	0.723	0.693	0.424	0.18	0.159	0.358	0.871	0.298	0.852	0.605
p53-derived	0.927	0.955	0.219	0.032	0.044	0.037	0.078	0.044	0.04	0.406

## Sheet: S9 Metabolism & Excretion
Table S9. Predicted metabolism and excretion parameters (admetSAR 3.0)
	CYP inhibitors						CYP substrates						Microsomal stability & excretion
Compound	CYP1A2	CYP3A4	CYP2B6	CYP2C9	CYP2C19	CYP2D6	CYP1A2	CYP3A4	CYP2B6	CYP2C9	CYP2C19	CYP2D6	HLM	RLM	UGT sub	CLp	CLr	T½ (−log h)	MRT (−log h)
KB-268	0.699	0.218	0.106	0.195	0.295	0.046	0.378	0.352	0.172	0.263	0.336	0.058	0.159	0.46	0.792	0.564	0.516	-0.379	-0.329
KB-269	0.57	0.887	0.382	0.944	0.948	0.179	0.411	0.631	0.242	0.543	0.542	0.128	0.62	0.833	0.611	0.623	0.534	-0.753	-0.586
KB-270	0.63	0.879	0.367	0.943	0.943	0.185	0.345	0.546	0.215	0.474	0.443	0.098	0.622	0.834	0.653	0.663	0.533	-0.622	-0.444
KB-271	0.302	0.918	0.448	0.953	0.956	0.199	0.471	0.786	0.325	0.616	0.677	0.24	0.706	0.852	0.402	0.726	0.513	-0.689	-0.461
KB-272	0.402	0.324	0.136	0.474	0.598	0.042	0.457	0.524	0.323	0.503	0.62	0.097	0.264	0.618	0.591	0.599	0.386	-0.652	-0.537
KB-280	0.712	0.879	0.451	0.952	0.941	0.156	0.453	0.646	0.268	0.506	0.531	0.136	0.595	0.798	0.547	0.634	0.462	-0.769	-0.605
KB-281	0.366	0.616	0.396	0.871	0.846	0.067	0.538	0.837	0.373	0.68	0.695	0.161	0.505	0.69	0.441	0.418	0.45	-0.927	-0.79
KB-282	0.077	0.504	0.168	0.459	0.52	0.096	0.565	0.892	0.317	0.666	0.778	0.155	0.404	0.56	0.491	0.315	0.353	-0.595	-0.491
KB-283	0.229	0.339	0.133	0.381	0.637	0.041	0.56	0.767	0.396	0.676	0.751	0.119	0.581	0.805	0.432	0.295	0.32	-0.59	-0.52
KB-292	0.59	0.524	0.221	0.472	0.767	0.059	0.571	0.743	0.489	0.611	0.676	0.102	0.301	0.597	0.338	0.248	0.303	-1.131	-1.122
NCC149	0.971	0.919	0.335	0.776	0.866	0.477	0.249	0.088	0.11	0.134	0.122	0.075	0.385	0.763	0.842	0.837	0.691	-0.143	0.04
PCI-34051	0.739	0.862	0.219	0.605	0.676	0.305	0.2	0.119	0.061	0.121	0.107	0.065	0.416	0.665	0.87	0.705	0.699	-0.285	-0.134
Entinostat	0.797	0.921	0.435	0.327	0.686	0.645	0.401	0.267	0.148	0.154	0.191	0.225	0.482	0.764	0.695	0.589	0.707	-0.662	-0.534
Octanediamide	0.184	0.84	0.291	0.703	0.524	0.23	0.083	0.206	0.057	0.081	0.049	0.083	0.711	0.735	0.785	0.756	0.768	-0.117	0.152
p53-derived	0.005	0.018	0.063	0.031	0.038	0.015	0.024	0.068	0.031	0.064	0.023	0.044	0.081	0.08	0.839	0.247	0.784	0.024	0.133

[truncated: 11 more sheets: S10 Toxicity, S11 EDC Panel, S12 Ecotoxicity, S13 Physicochemical, S14 Correlation Analysis, S15-18 SAR Summary, S19-21 Drug-likeness & Stats, S22-24 ADMET Summary, S25 KB-268 spectra, S26 KB-270 spectra, S27 KB-292 spectra]
